# Supplementary material for: Label-free breast cancer detection using fiber probe-based Raman spectrochemical biomarker-dominated profiles extracted from a mixture analysis algorithm
Source: Royal Society of Chemistry journal article supplement (doi:10.1039/d1ay00491c), 2021-01-01
Supplement: d1ay00491c1.pdf [file d1ay00491c1.pdf]

## Electronic Supplementary Information (ESI)

# Label-free breast cancer detection using fiber probe-based Raman spectrochemical biomarker-dominated profiles extracted from a mixture analytic algorithm

### ■ Procedure of the PCMA mixture analytic algorithm

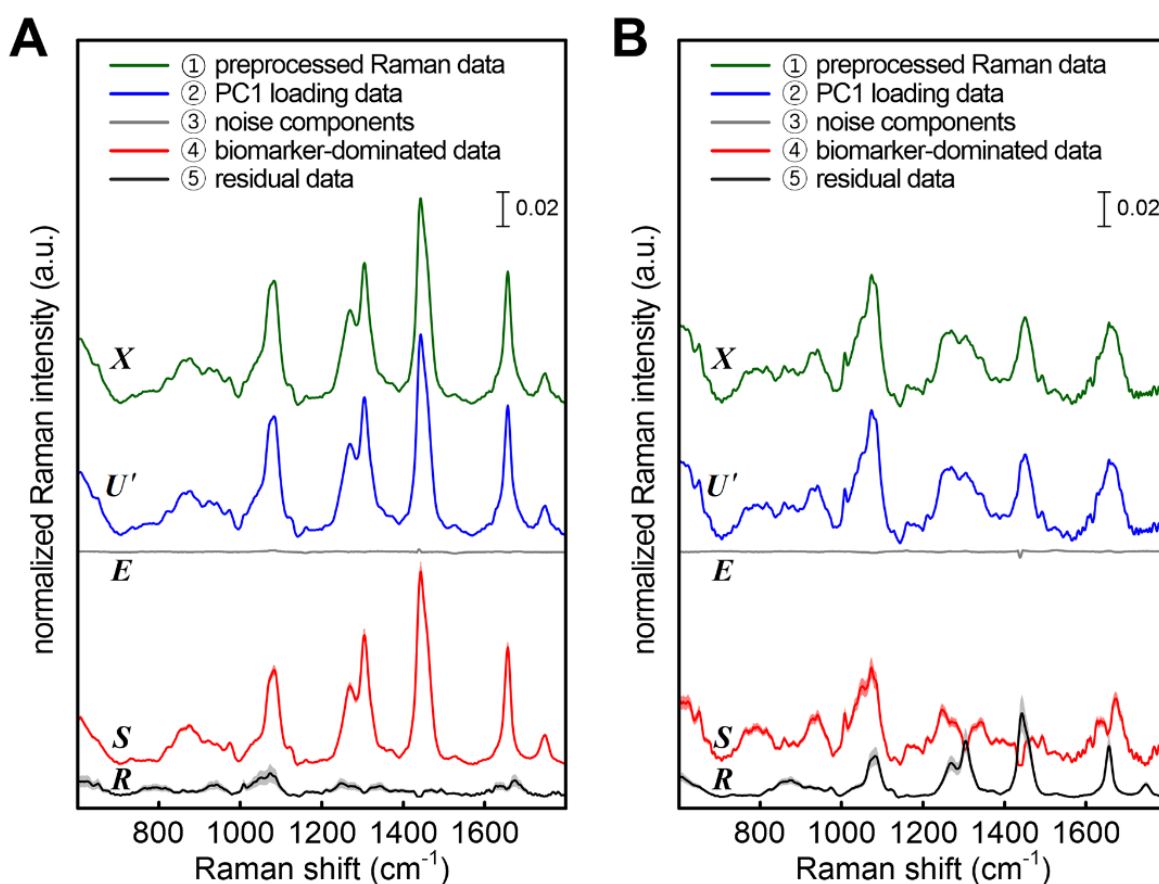

**Fig. S1** The procedure of the PCMA mixture analytic algorithm to find the biomarker-predominated data for (A) normal and (B) cancer groups. Each waveform indicates the representative Raman spectrochemical spectrum in each step where ①  $X$  denotes  $m \times n$  preprocessed Raman spectrochemical data sets, ②  $U'$  denotes the PC loading matrix, ③  $E$  denotes the noise components ( $X - U'$ ), ④  $S$  denotes the biomarker-dominated PCMA Raman spectrochemical data, and ⑤  $R$  denotes the residual matrix ( $U' - S$ ).

■ Signal-to-noise ratio (SNR) of the Raman peaks

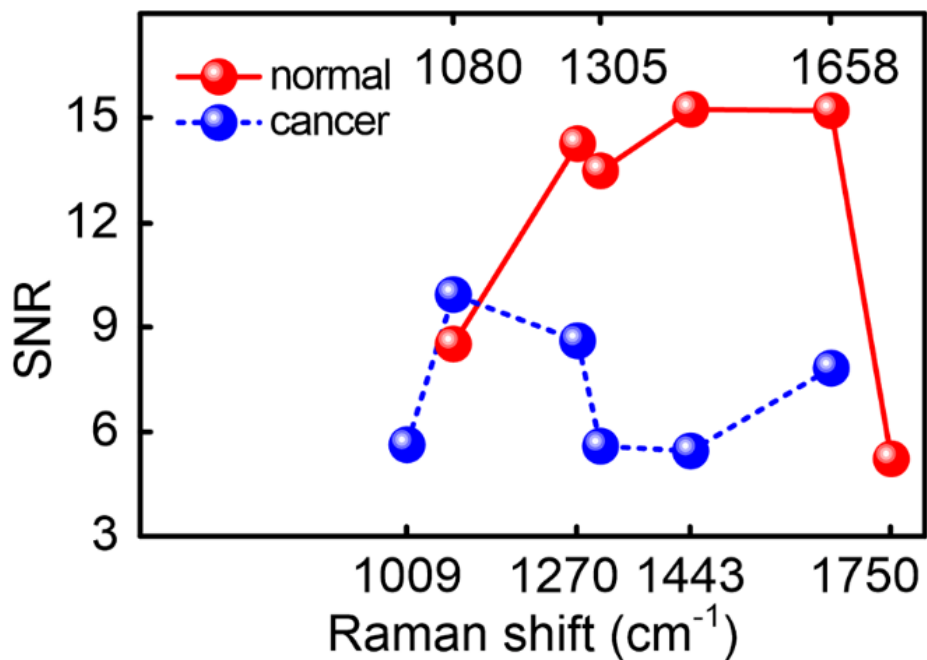

**Fig. S2** The SNR of unique Raman peaks associated with candidate biomarkers for screening the presence of tumors in breast tissues, such as 1009, 1080, 1270, 1305, 1443, 1658, and 1750 cm<sup>-1</sup>.
